# Supplementary material for: Self-assembly synthesis and electrochemical performance of Li1.5Mn0.75Ni0.15Co0.10O2+δ microspheres with multilayer shells
Source: Royal Society of Chemistry journal article supplement (doi:10.1039/c4ta05281a), 2015-01-01
Supplement: c4ta05281a1.pdf [file c4ta05281a1.pdf]

## Supplementary Information

### **Self-assembly synthesis and electrochemical performance of the**

### **$\text{Li}_{1.5}\text{Mn}_{0.75}\text{Ni}_{0.15}\text{Co}_{0.10}\text{O}_{2+\delta}$ microspheres with multilayer shells**

Ruizhi Yu, Xianyou Wang\*, Di Wang, Long Ge, Hongbo Shu, Xiukang Yang\*

*(Key Laboratory of Environmentally Friendly Chemistry and Applications of Ministry of*

*Education, Hunan Province Key Laboratory of Electrochemical Energy Storage and Conversion,*

*School of Chemistry, Xiangtan University, Hunan, Xiangtan 411105, China)*

**Keywords:** Lithium-ion batteries; Lithium-rich layered cathode material;

Hierarchically multilayer shells; Co-precipitation method

---

\* **Corresponding author:** Xianyou Wang, Xiukang Yang, Tel: +86 731 58292060; Fax: +86 731 58292061.

E-mail address: [wxianyou@yahoo.com](mailto:wxianyou@yahoo.com) (X. Wang), [yshowk23@163.com](mailto:yshowk23@163.com) (X. Yang)

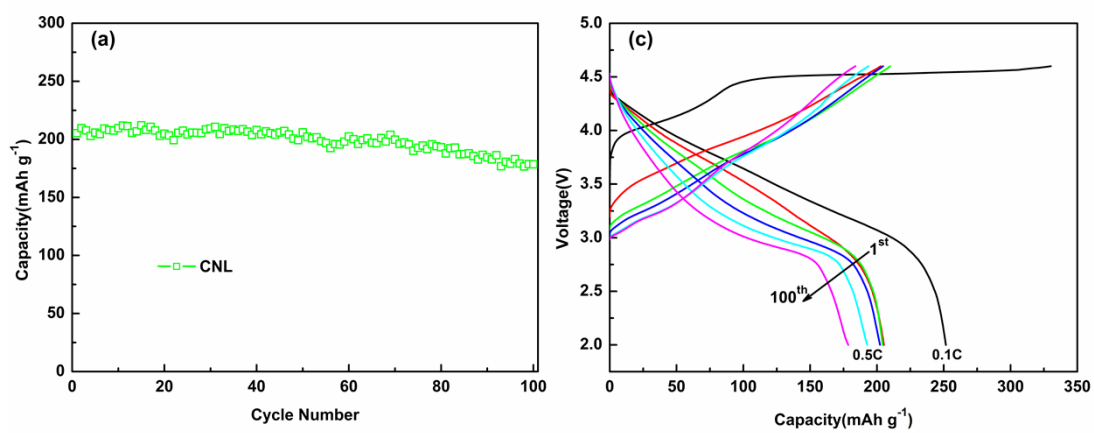

**Fig. S1** (a) Capacity retention of Li/CNL cell; (b) the continuous charge/discharge curves of the 1<sup>st</sup>, 50<sup>th</sup>, 75<sup>th</sup>, 100<sup>th</sup> cycles for Li/CNL cell at a rate of 0.5 C in the voltage range of 2.0-4.6 V.

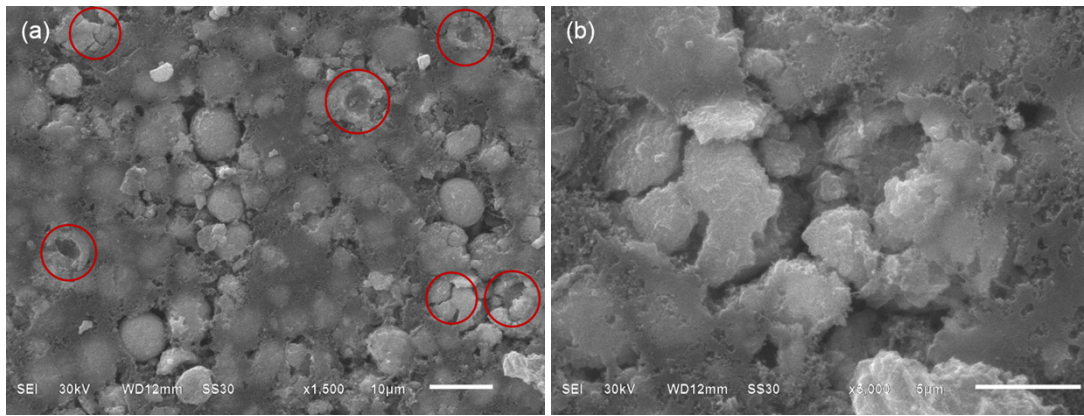

**Fig. S2** SEM images of CNL electrodes after 100 cycles.

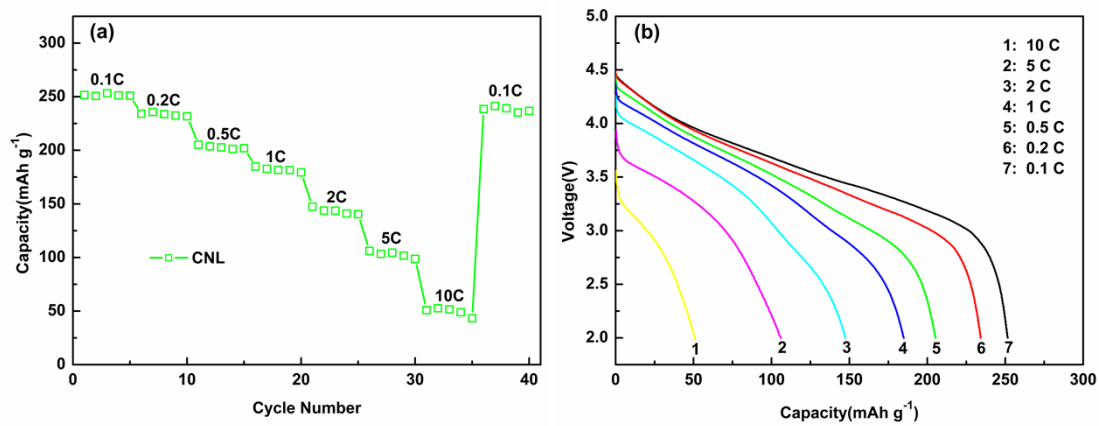

**Fig. S3** (a) Discharge capacity versus cycle number of Li/CNL cell; (b) discharge curves of

Li/CNL cell at various rates in the voltage range of 2.0-4.6 V.

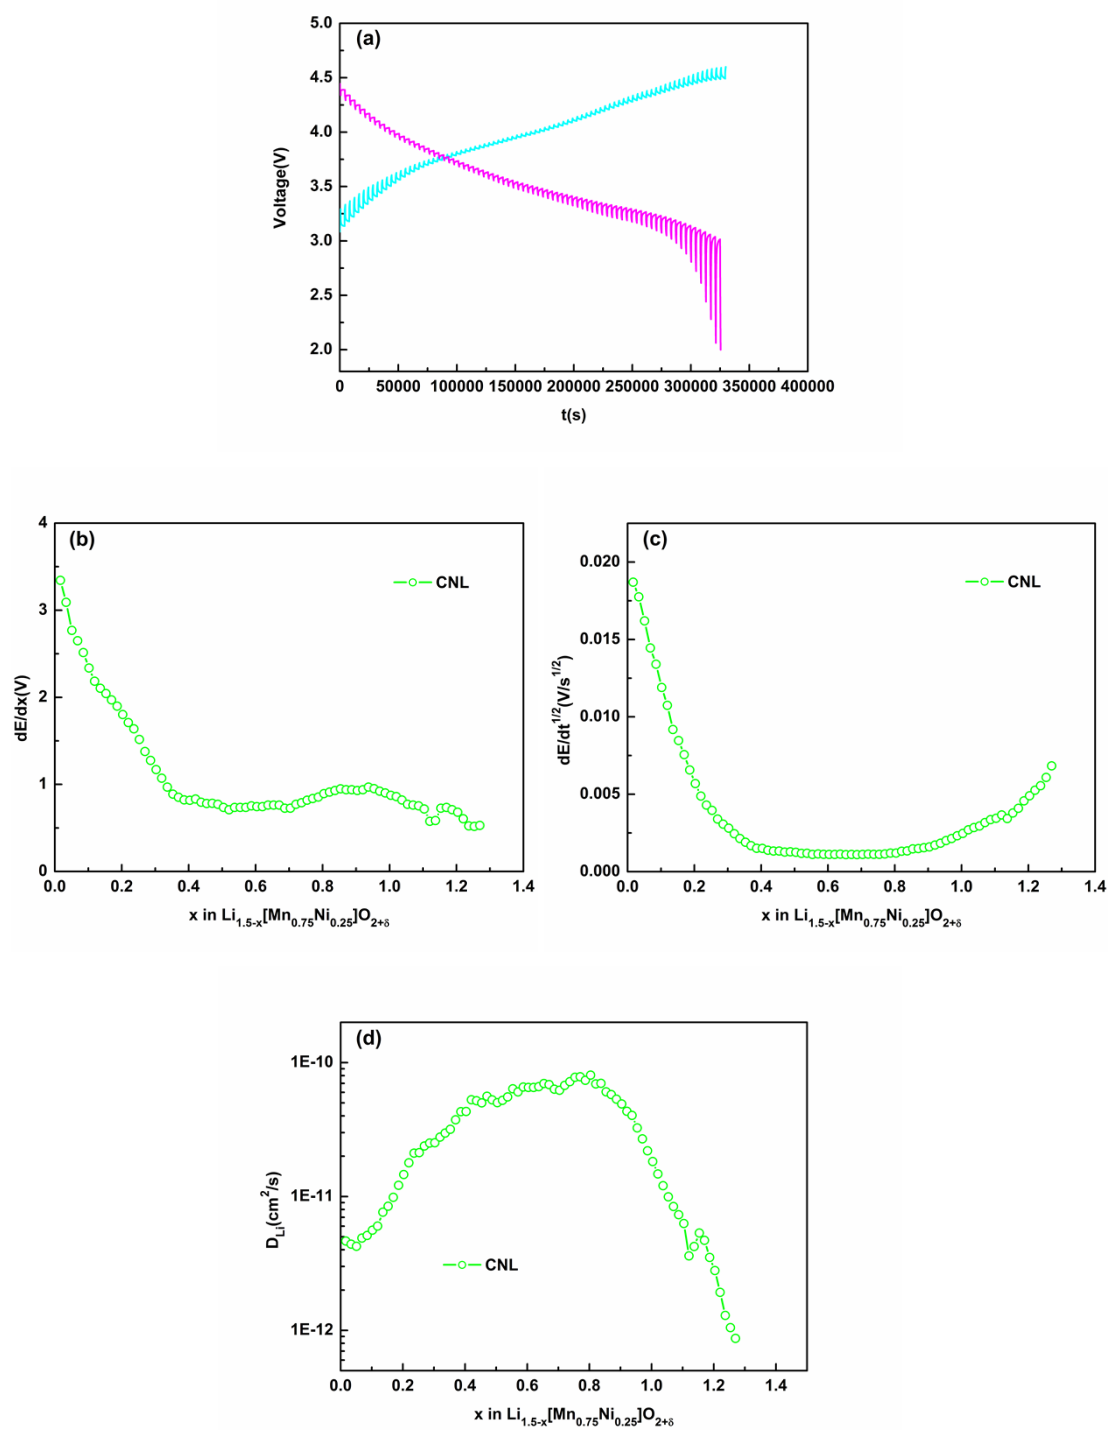

**Fig. S4** (a) The GITT curves of CNL cathode materials as a function of time in the voltage range of 2.0-4.6 V; (b)  $dE/dx$  and (c)  $dE/dt^{1/2}$  as a function of the stoichiometry  $x$ ; and (d) the calculated  $D_{\text{Li}^+}$  values of the CNL cathode materials as a function of the stoichiometry  $x$ .
